# Supplementary material for: Evidence for the use of complementary and alternative medicines during fertility treatment: a scoping review
Source: Springer Nature journal article supplement (doi:10.1186/s12906-018-2224-7), 2018-05-15

# CAM review sheet

To analyze the validity and evidence of CAM methods

\* Required

## 1. Full APA citation \*

---

## 2. Language of article \*

Mark only one oval.

- ☐ English
- ☐ French
- ☐ Chinese
- ☐ Chinese with English Abstract
- ☐ Korean

## 3. Type of CAM \*

Check all that apply.

- ☐ Acupuncture
- ☐ Ayurveda
- ☐ Chinese Medicine (Traditional or Herbal)
- ☐ Chiropractory
- ☐ Herbal Medicine (Not Chinese)
- ☐ Homeopathy
- ☐ Hypnotherapy/hypnosis
- ☐ Kinesiology
- ☐ Massage
- ☐ Meditation
- ☐ Naturopathy
- ☐ Osteopathy
- ☐ Relaxation
- ☐ Reflexology
- ☐ Yoga

**4. If drugs/preparations were used, which ones?**

---

---

---

---

---

**5. Type of Study \****Mark only one oval.*

- ☐ Meta-analysis
- ☐ Systematic Review of randomized control trials
- ☐ Nonsystematic Review
- ☐ Randomized Controlled Trial
- ☐ Pseudorandomized Controlled Trial
- ☐ Non-Randomized Experimental Trials
- ☐ Case-Controlled Study
- ☐ Retrospective and Prospective cohort Study
- ☐ Interrupted Time-Series with Controls
- ☐ Interrupted Time Series without Controls
- ☐ Historical control studies
- ☐ Two or more single-arm studies
- ☐ Case Series
- ☐ Survey
- ☐ Qualitative Interviews
- ☐ Opinion
- ☐ Other: \_\_\_\_\_

**Characteristics of Sample****6. N= (population size)**

---

**7. Description of control group (if any); n, what type of control**

---

---

---

---

---

**8. Description of treatment group (n=) \***

---

---

---

---

---

**Research Question****9. What is the research question? \***

---

---

---

---

---

**10. What is the outcome measured? \***

*Check all that apply.*

- ☐ Female Factor Infertility
- ☐ Male Factor Infertility
- ☐ Mental Health
- ☐ Other: \_\_\_\_\_

**11. How did they measure the outcome? \****Check all that apply.*

- ☐ Sperm count
- ☐ Sperm morphology
- ☐ Sperm concentration/volume
- ☐ Sperm Motility
- ☐ Live birth rate
- ☐ Ovulation
- ☐ Implantation Rates
- ☐ Pregnancy rate
- ☐ Miscarriage Rate
- ☐ Number of oocytes retrieved
- ☐ Spontaneous Abortion Rate
- ☐ Depression levels
- ☐ Anxiety levels
- ☐ Stress levels
- ☐ Fertility-related (di)stress
- ☐ Quality of life
- ☐ Marital satisfaction
- ☐ Other: \_\_\_\_\_

## Findings

**12. Did the study find that the treatment improved the fertility outcome(s)? \****Mark only one oval.*

- ☐ Yes, improved the outcome
- ☐ No, it did not improve the outcome (i.e. no change)
- ☐ No, it had a negative impact on the outcome (e.g. resulted in a worsening of the outcome)
- ☐ Mixed results (please explain below)
- ☐ Unclear, the article does not have a clear conclusion (please explain below)

**13. If mixed results or unclear above, please explain here.**

---

---

---

---

---

14. How much did the study affect the outcome? (give percentages, changes in odds-ratios with p-values if available) \*

---

---

---

---

---

15. Was statistical significance achieved? (p value less than or equal to .05) \*

*Mark only one oval.*

- ☐ Yes
- ☐ No
- ☐ Marginal significance achieved (p value less than or equal to .10)
- ☐ The study does not report p values

## Abstract

16. Does the article support the abstract? \*

*Mark only one oval.*

- ☐ Yes
- ☐ No

17. If no, what are the differences between the article and the abstract?

---

---

---

---

---

## Conflict of Interest

18. Do the author(s) report any conflict of interests? \*

---

---

---

---

---

19. Do you see any conflicts of interests?

---

---

---

---

---

## Additional Information

20. Do you think that the study is valid? \*

*Mark only one oval.*

☐ Yes

☐ No

21. What problems, if any, do you see in this article?

---

---

---

---

---

Powered by

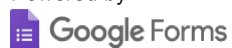

Supplement: MOESM2 [file 15765404]
